# Supplementary material for: Characteristics of planar and planar layer-stacked CHON-containing molecules
Source: Royal Society of Chemistry journal article supplement (doi:10.1039/d3ce01177a), 2024-01-01
Supplement: d3ce01177a1.pdf [file d3ce01177a1.pdf]

## **Characteristics of planar and planar layer-stacked CHON-containing molecules**

**Shitai Guo,<sup>a,b</sup> Kairui Xue,<sup>b</sup> Jing Huang,<sup>b</sup> Weihua Zhu,<sup>a</sup> and Chaoyang Zhang<sup>\*b,c</sup>**

<sup>a</sup> *School of Chemistry and Chemical Engineering, Nanjing University of Science and Technology, Nanjing 210094, China.*

<sup>b</sup> *Institute of Chemical Materials, China Academy of Engineering Physics (CAEP), P. O. Box 919-311, Mianyang, Sichuan 621900, China.*

<sup>c</sup> *Beijing Computational Science Research Center, Beijing 100193, China.*

## **Supporting Information**

## Supplementary Figures

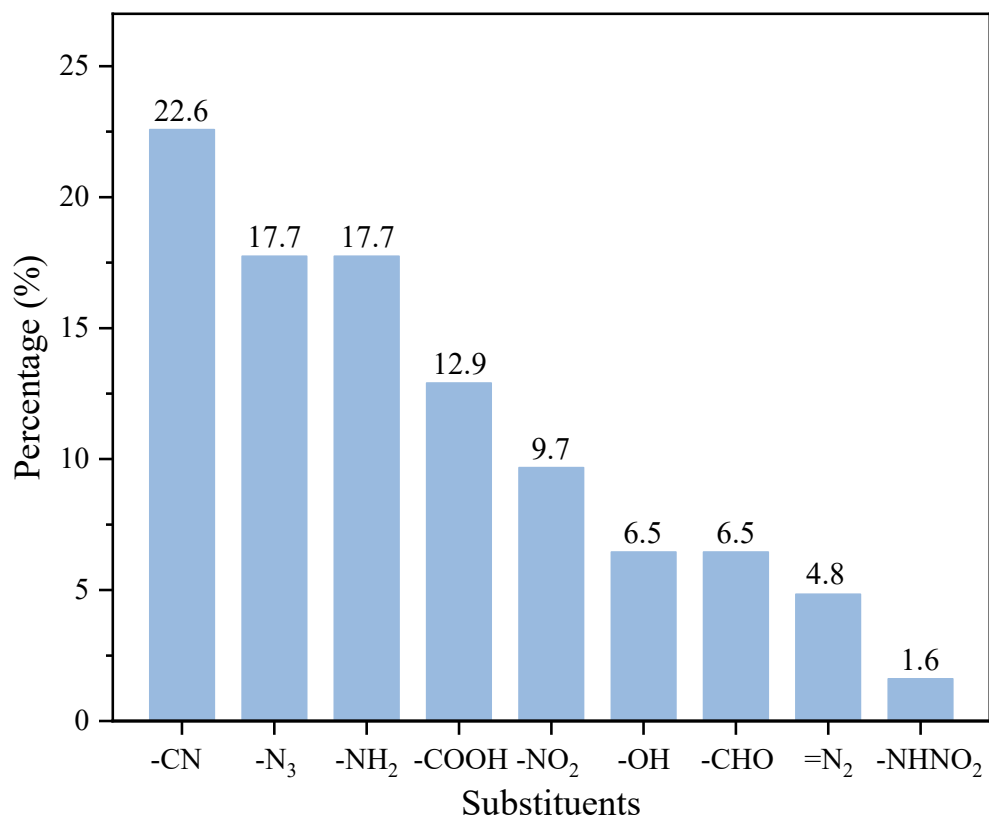

Fig. S1. Distribution of substituents of highly planar molecules with planarity of 0-0.005 Å.
